# Supplementary material for: Multilevel nanoimprint lithography with a binary mould for plasmonic colour printing
Source: Royal Society of Chemistry journal article supplement (doi:10.1039/d0na00038h), 2020-01-01
Supplement: d0na00038h1.pdf [file d0na00038h1.pdf]

# Electronic Supplementary Information

## Multilevel Nanoimprint Lithography with a Binary Mold for Plasmonic Colour Printing

Muhammad Faris Shahin Shahidan,<sup>†</sup> Jingchao Song,<sup>†</sup> Timothy D James,<sup>†,‡</sup> and  
Ann Roberts<sup>\*,†</sup>

<sup>†</sup>*School of Physics, The University of Melbourne, 3010, Australia*

<sup>‡</sup>*Reserve Bank of Australia, Craigieburn, Victoria, 3064, Australia*

E-mail: mshahidan@student.unimelb.edu.au

## Nanoimprint Lithography Results

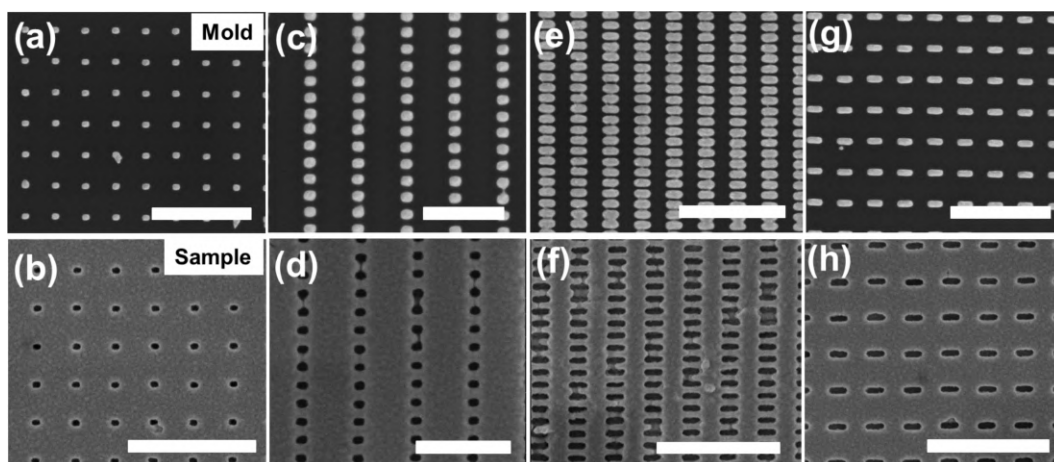

**Figure S1:** SEM images of fabricated mould with different particle geometry: (a)  $l=75$  nm,  $P_x=100$  nm, (c)  $l=75$  nm,  $P_x=300$  nm, (e)  $l=150$  nm,  $P_x=100$  nm and (d)  $l=150$  nm,  $P_x=300$  nm; and SEM images of the corresponding fabricated sample with different particle geometry: (b)  $l=75$  nm,  $P_x=100$  nm, (d)  $l=75$  nm,  $P_x=300$  nm, (f)  $l=150$  nm,  $P_x=100$  nm and (h)  $l=150$  nm,  $P_x=300$  nm. All scale bars refer to 500 nm

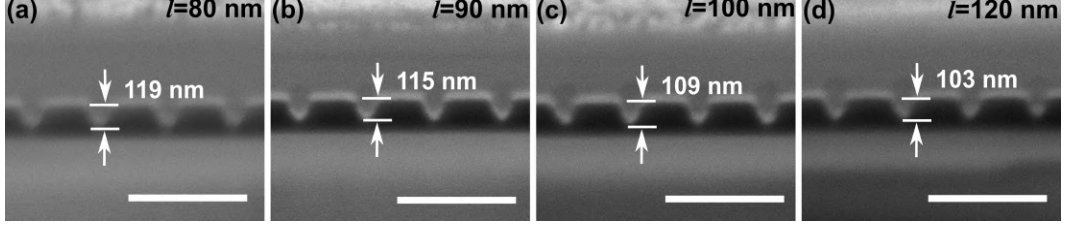

**Figure S2:** Cross-sectional images of the shows the height of the imprinted structures with fixed periodicity,  $P_x$  but varying length,  $l$  from 80-120 nm. All scale bars refers to 500 nm

**Table S1:** Table showing the relationship between the periodicity,  $P_x$  of the imprinted structures and the resultant vertical gap size,  $g$  (and the standard deviation) measured from the SEM images. The equation of line of best fit and the r-square value were obtained from the line plot showed in Figure 3.

|                              |                   |       |       |       |       |       |
|------------------------------|-------------------|-------|-------|-------|-------|-------|
| Periodicity, $P_x$ (nm)      | 100               | 140   | 180   | 220   | 260   | 300   |
| Vertical gap size, $g$ (nm)  | 15.3              | 27.2  | 39.3  | 53.6  | 65.5  | 84.6  |
| $g$ (standard deviation, nm) | 2.862             | 4.093 | 4.467 | 3.872 | 3.086 | 4.658 |
| Equation of line of best fit | $y=0.339x-20.371$ |       |       |       |       |       |
| R-square value               | 0.99365           |       |       |       |       |       |

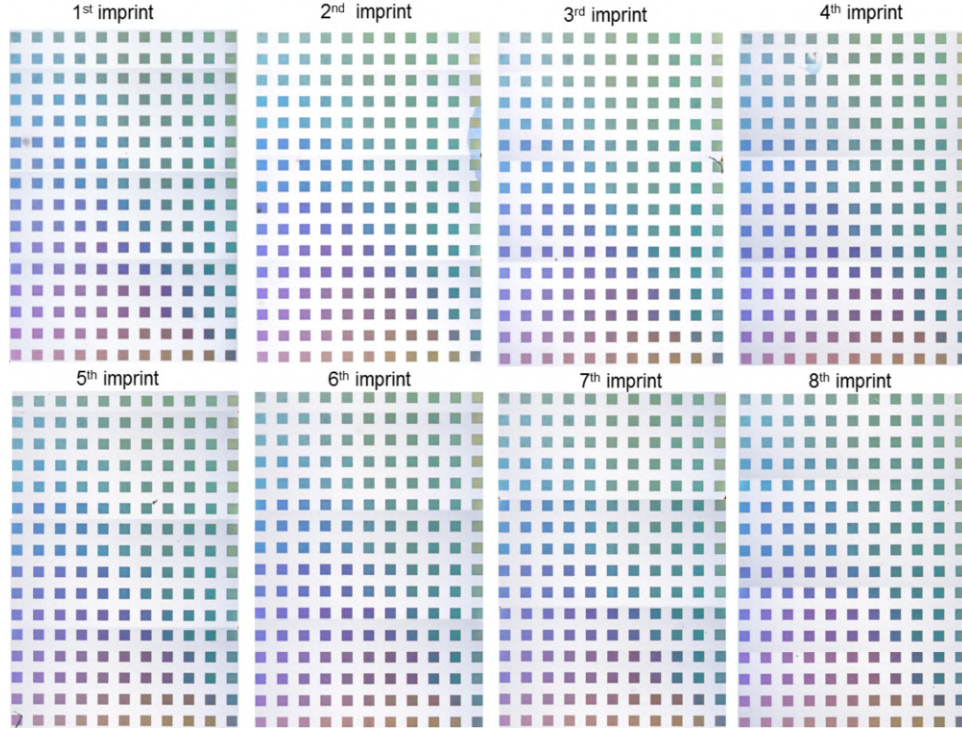

**Figure S3:** Bright field image of color palettes of reproduced nanoimprinted samples from first to eighth imprints under linearly polarized light with direction parallel to the long-axis of the nanorods

# Finite Element Method (FEM) Simulations Results

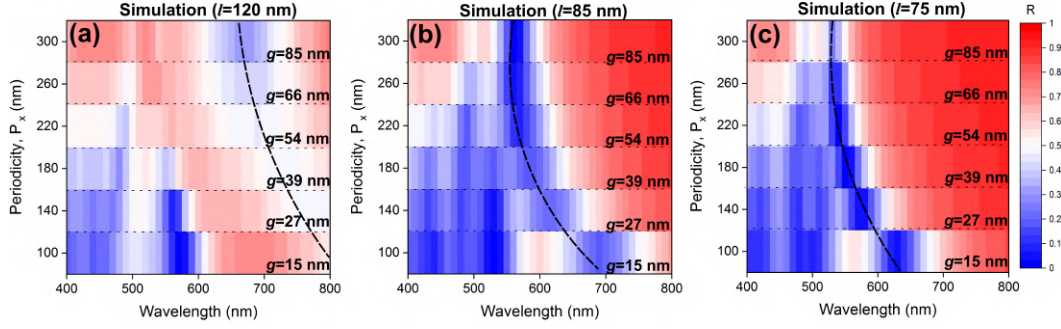

**Figure S4:** Simulated 2D reflectance map showing the effect of lattice period,  $P_x$  and film/nanorod gap,  $g$  for nanorod of length (a)  $l=120$  nm, (b)  $l=85$  nm and (c)  $l=75$  nm. The dashed line indicate the shift of the resonance wavelength (dipole mode) as the gap increases.

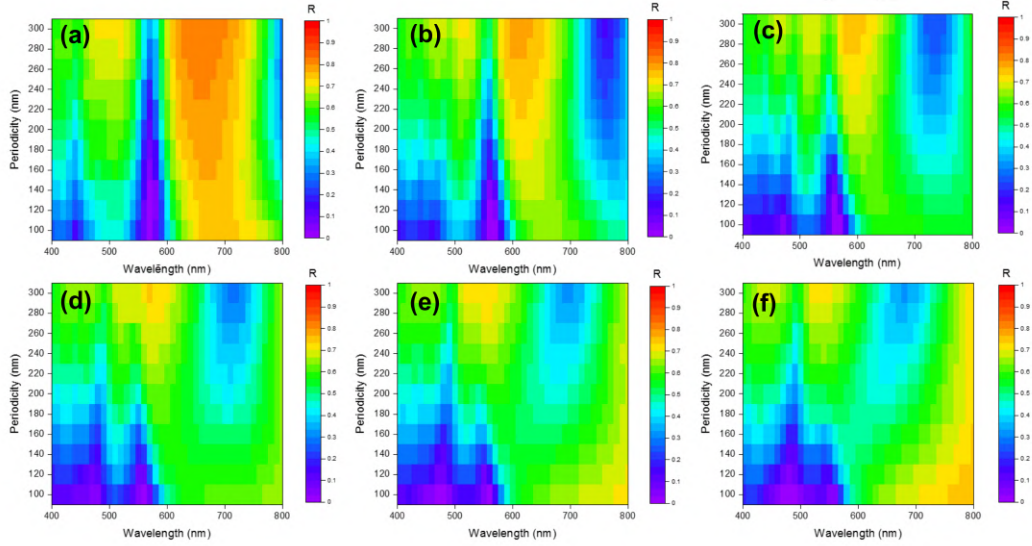

**Figure S5:** Simulated 2D reflectance map showing the effect of lattice period,  $P_x$  for different film/nanorod gap size,  $g$  i.e (a)  $g=10$  nm, (b)  $g=20$  nm, (c)  $g=30$  nm, (d)  $g=40$  nm, (e)  $g=50$  nm and (f)  $g=60$  nm
